# Supplementary material for: Janus SMoZAZ′ (A = Si, Ge; Z, Z′ = N, P, As; Z ≠ Z′) monolayers: potential water-splitting photocatalyst with low carrier recombination rate
Source: Royal Society of Chemistry journal article supplement (doi:10.1039/d3cy01416a), 2024-01-01
Supplement: d3cy01416a1.pdf [file d3cy01416a1.pdf]

## Supplementary Information

**Janus S<sub>Mo</sub>ZAZ' (A=Si,Ge; Z, Z'= N, P, As; Z≠Z')**

**monolayers: potential water-splitting photocatalyst with low  
carrier recombination rate**

Zhen Gao<sup>a</sup>, Yao He<sup>a,\*</sup>, and Kai Xiong<sup>b</sup>

<sup>a</sup>*Department of Physics, Yunnan University, Kunming 650091, People's Republic of China.*

<sup>b</sup>*Materials Genome Institute, School of Materials and Energy, Yunnan University, Kunming  
650091, P. R. China.*

\*E-mail:

[yhe@ynu.edu.cn](mailto:yhe@ynu.edu.cn)

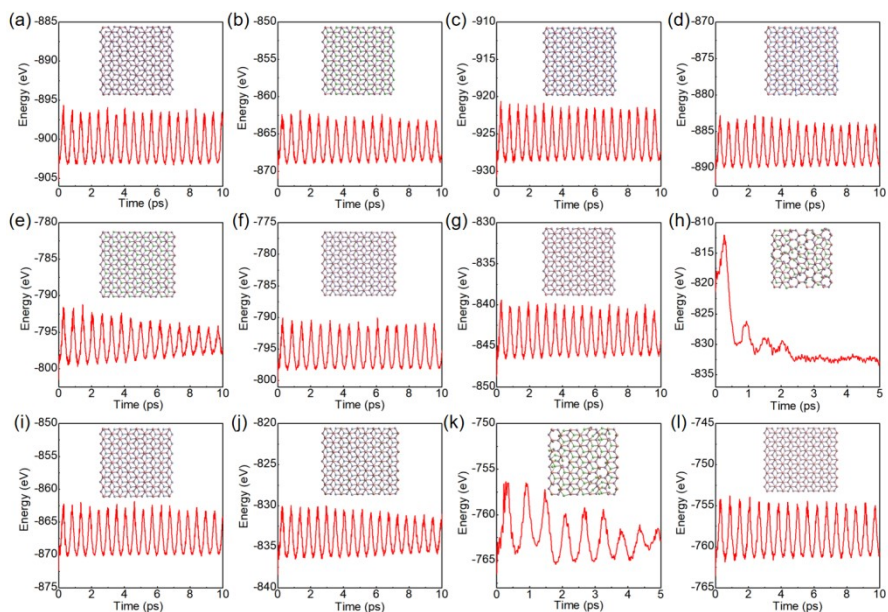

Fig S1 (a-l) Variation of the energy as a function of time for the Janus SMoNSiP, SMoNSiAs, SMoPSiN, SMoAsSiN, SMoPSiAs, SMoAsSiP, SMoNGeP, SMoNGeAs, SMoPGeN, SMoAsGeN, SMoPGeAs, and SMoAsGeP monolayers at 300K. The insets are the top view of the structure at the end of the AIMD simulation.

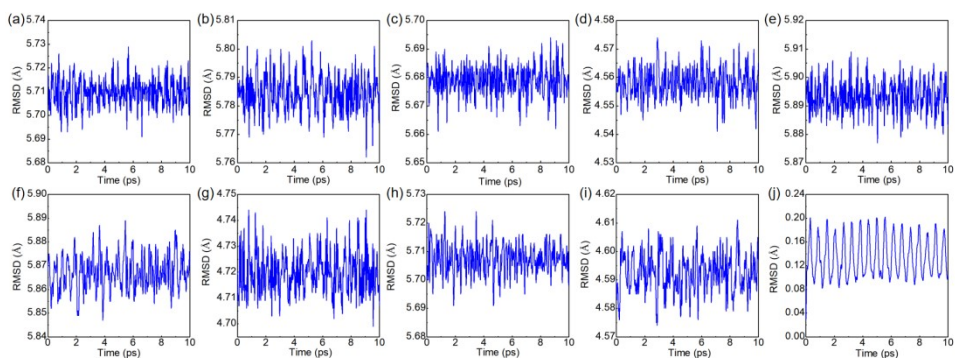

Fig S2 The RMSD variation in AIMD simulation process.

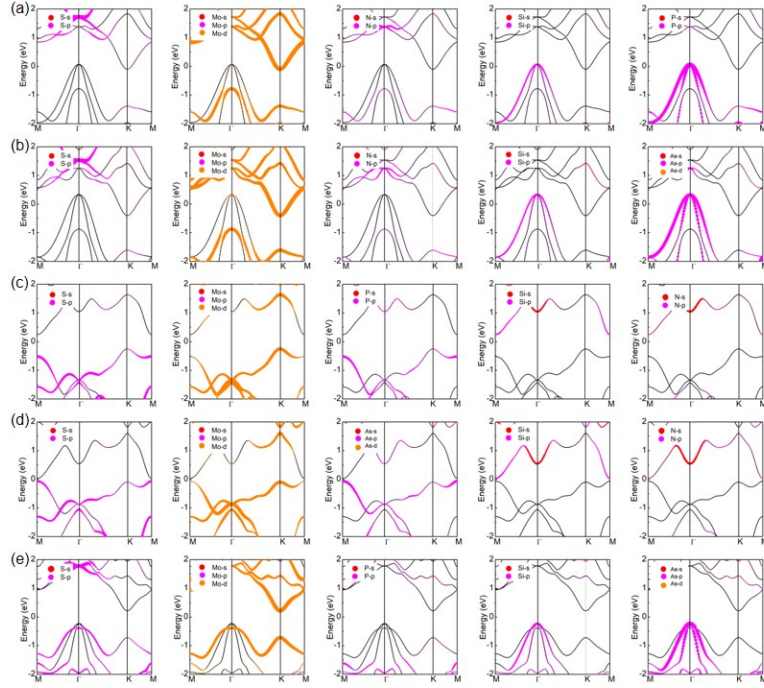

Fig S3 Projected band structure of 2D Janus (a) SMO NSiP, (b) SMO NSiAs, (c) SMO PSiN, (d) SMO AsSiN, and (e) SMO PSiAs.

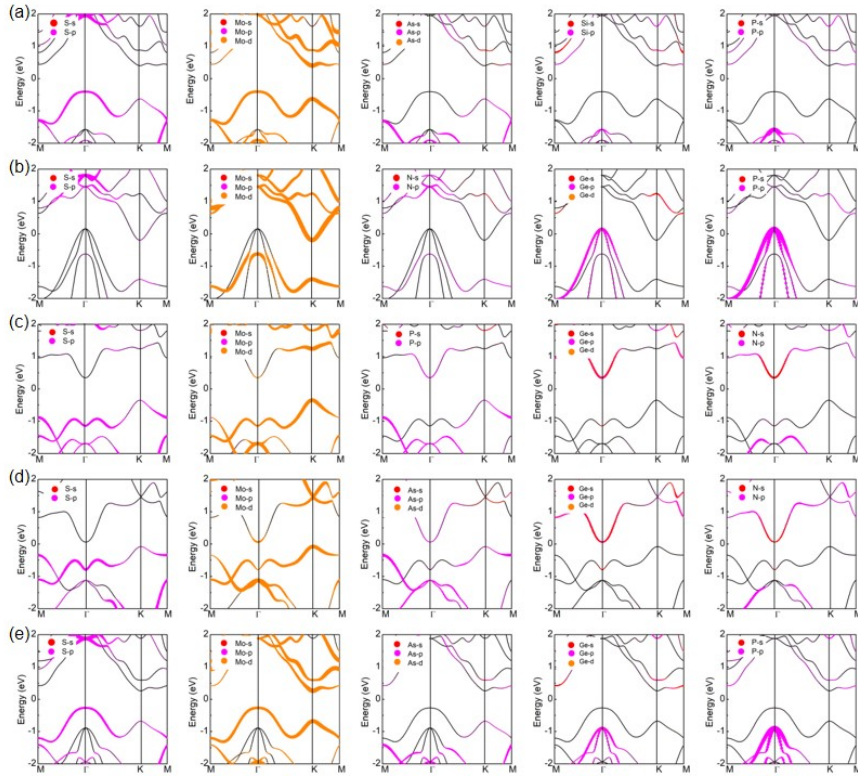

Fig S4 Projected band structure of 2D Janus (a) SMO NGeP, (b) SMO NGeAs, (c) SMO PGeN, (d) SMO AsGeN, and (e) SMO PGeAs.

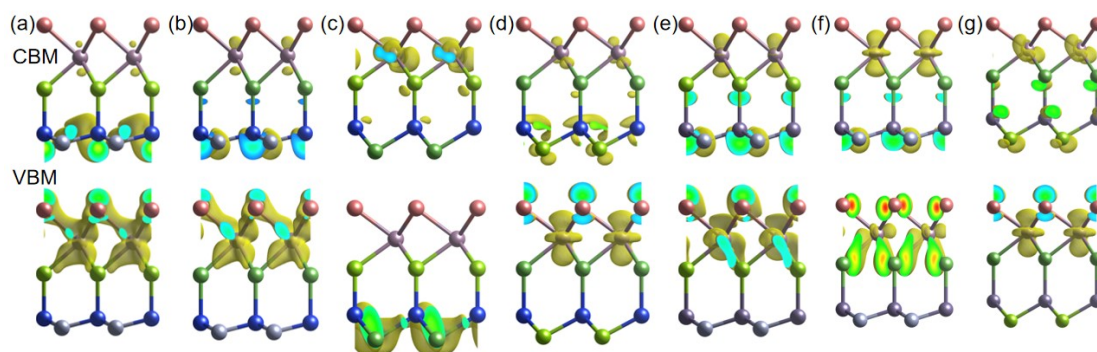

Fig S5 The charge density of the CBM and VBM of (a) SMOpSiN, (b) SMOAsSiN, (c) SMOpSiAs, (d) SMOngGeAs, (e) SMOpGeN, (f) SMOAsGeN and (g) SMOpGeAs monolayers. The isosurface values of SMOZAZ' monolayers are taken as  $0.015 \text{ e}\text{\AA}^{-3}$ .

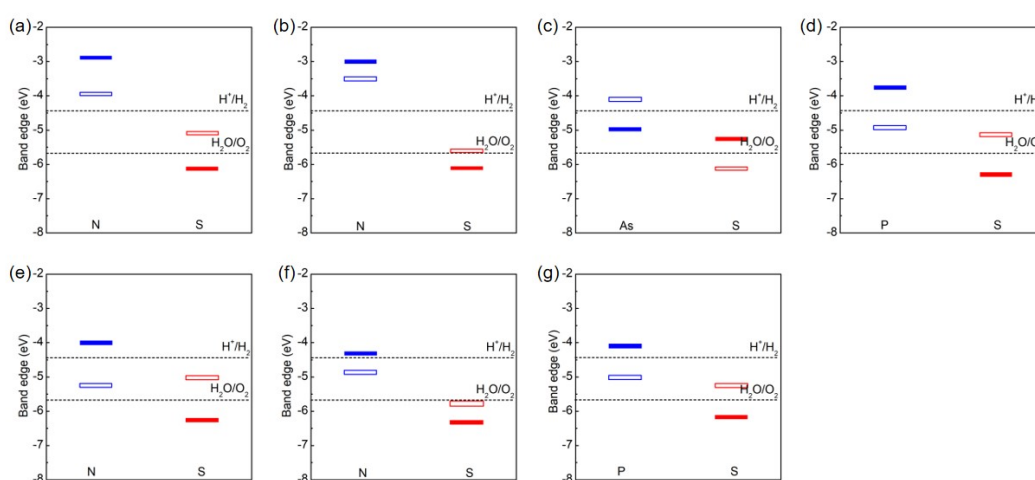

Fig S6 Theoretical band edges with respect to the redox potential of water for (a) SMOpSiN, (b) SMOAsSiN, (c) SMOpSiAs, (d) SMOAsSiP, (e) SMOpGeN, (f) SMOAsGeN and (g) SMOAsGeP monolayers. The hollow rectangle indicates the absence of CBM and VBM, and only the solid rectangles are physically meaningful.

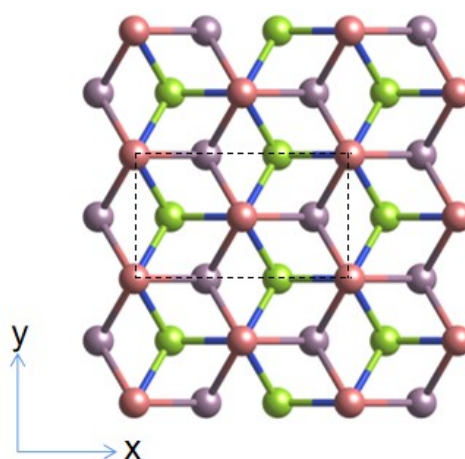

Fig S7 The calculation of carrier mobility is carried out in rectangular cell in the black dotted box, the x and y directions also been indicate.

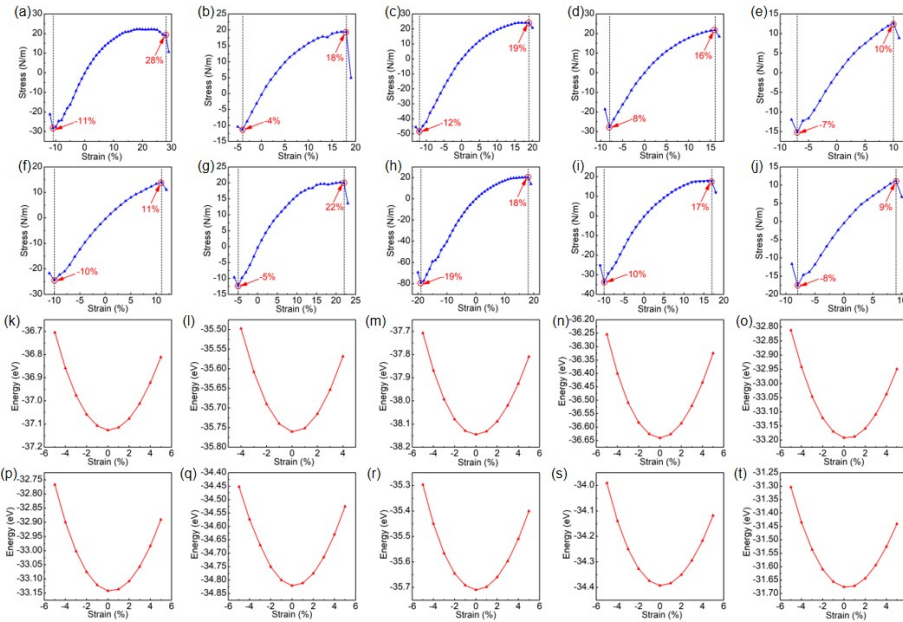

Fig S8 (a-j) Strain-stress curve and (k-t) energy-strain curve for 2D Janus SMoNSiP, SMoNSiAs, SMoPSiN, SMoAsSiN, SMoPSiAs, SMoAsSiP, SMoNGeP, SMoPGeN, SMoAsGeN and SMoAsGeP monolayers.

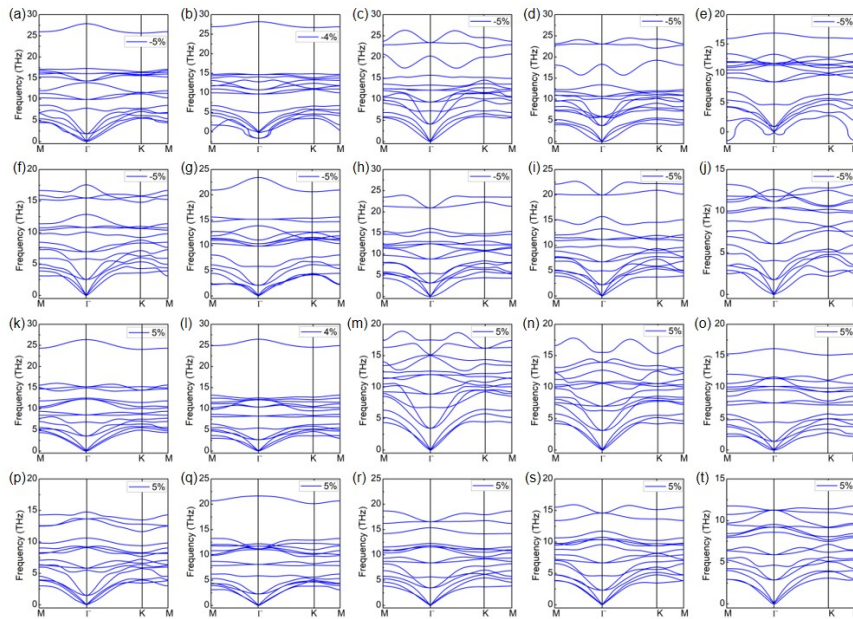

Fig S9 Phonon spectrum of SMoNSiP, SMoPSiN, SMoAsSiN, SMoPSiAs, SMoAsSiP, SMoNGeP, SMoPGeN, SMoAsGeN and SMoAsGeP monolayers under strain of (a, c-j) -5% and (k, m-t) +5%, respectively. Phonon spectrum of SMoNSiAs under strain of (b) -4% and (l) +4%,

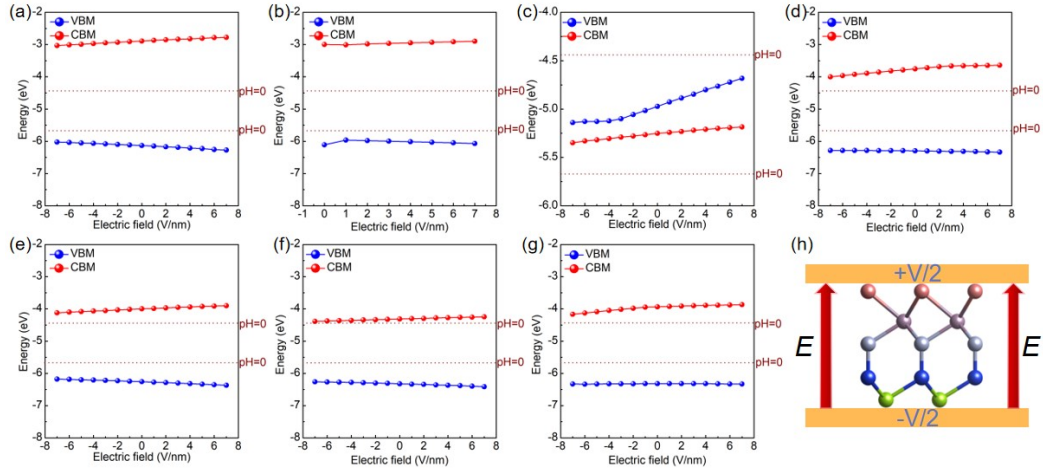

Fig S10 Band alignments of Janus (a) SMOPSiN, (b) SMOAsSiN, (c) SMOPSiAs, (d) SMOAsSiP, (e) SMOpGeN, (f) SMOAsGeN and (g) SMOAsGeP under external electric field. (h) The top view of Janus SMOZAZ' (A=Si, Ge; Z, Z'=N, P, As, Z≠Z') under external electric field.

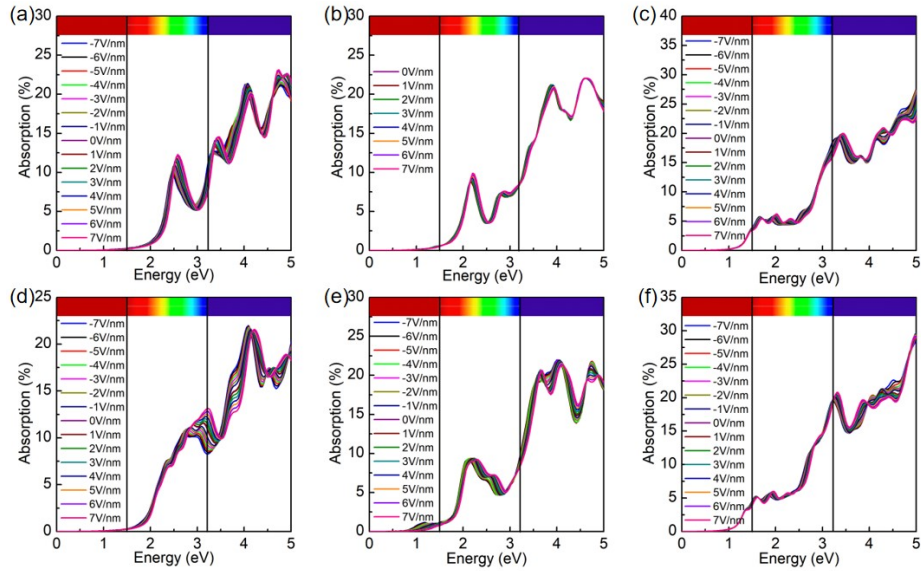

Fig S11 The light absorption of Janus (a) SMOPSiN, (b) SMOAsSiN, (c) SMOAsSiP, (d) SMOpGeN, (e) SMOAsGeN and (f) SMOAsGeP with biaxial strain.
